# Supplementary material
Source: Elsevier journal article supplement (https://comptes-rendus.academie-sciences.fr/biologies/article/10.1016/j.crvi.2017.08.004/file/attach/mmc1.pdf)
Supplement: mmc1 [file mmc1.pdf]

Supplementary material to:

***Gymnocranius obesus*, a new large-eye seabream from the Coral Triangle**

Wei-Jen Chen <sup>a</sup>, Ryohei Miki <sup>b</sup>, Philippe Borsa <sup>c</sup>

<sup>a</sup> [wjchen.actinops@gmail.com](mailto:wjchen.actinops@gmail.com)

<sup>b</sup> [ad13007@student.miyazaki-u.ac.jp](mailto:ad13007@student.miyazaki-u.ac.jp)

<sup>c</sup> [philippe.borsa@ird.fr](mailto:philippe.borsa@ird.fr)

**Supplementary Table S1.** *Gymnocranius obesus* sp. nov. Measurements (following [1]) on voucher specimens other than type material, including NMMBP-21546 from Hengchun town, 19 August 2011; NTUM 10741 comprising two specimens from Hengchun town, 10 March 2015; NTUM 10827 from Hengchun town, 10 March 2015. Initial sample number assigned to an individual is given in brackets. *NMMB* National Museum of Marine Biology and Aquarium, Pingtung; *NTUM* National Taiwan University Museums, Taipei; *AF* anal fin; *BD* largest body depth; *CF* caudal fin; *DF* dorsal fin; *SL* standard length

| Measurement                                  | Specimen no.            |                        |                        |                         |               |
|----------------------------------------------|-------------------------|------------------------|------------------------|-------------------------|---------------|
|                                              | NMMBP-21546<br>(Let426) | NTUM 10741<br>(Let891) | NTUM 10741<br>(Let892) | NTUM 10827<br>(Let1192) | -<br>(Let890) |
| SL (mm)                                      | 183                     | 208                    | 190                    | 232                     | 173           |
| Body depth (BD) (mm)                         | 82                      | 96                     | 85                     | 98                      | 78            |
| BD at origin of DF (BDd) (mm)                | -                       | 95                     | 84                     | 96                      | 77            |
| BD at origin of AF (mm)                      | -                       | 88                     | 78                     | 90                      | 72            |
| Head length (HL) (mm)                        | 58.0                    | 66.4                   | 63.5                   | 78.0                    | 57.3          |
| Snout length (mm)                            | 23.6                    | 23                     | 22.2                   | 29.5                    | 20            |
| Eye diameter (ED) (mm)                       | 21.6                    | 23.3                   | 25.2                   | 29.2                    | 21.7          |
| Inter-orbital width (IOW) (mm)               | 22.0                    | 22.0                   | 22.7                   | 27.0                    | 19.2          |
| Predorsal length (mm)                        | -                       | 77                     | 75                     | 94                      | 65            |
| Prepelvic length (mm)                        | -                       | 72                     | 68                     | 83                      | 56            |
| Preanal length (mm)                          | -                       | 127                    | 119                    | 140                     | 104           |
| Median ray of caudal fin(MRC)<br>length (mm) | -                       | 22.6                   | 22.7                   | 26.5                    | 19.9          |
| DF spines, rays                              | X, 10                   | X, 10                  | X, 10                  | X, 10                   | X, 10         |
| AF spines, rays                              | III, 10                 | III, 10                | III, 10                | III, 10                 | III, 10       |
| Pored scales on lateral line                 | 47                      | 47                     | 47                     | 48                      | 48            |
| Ratio of SL to BD                            | 2.23                    | 2.16                   | 2.25                   | 2.38                    | 2.23          |
| Ratio of SL to BDd                           | -                       | 2.20                   | 2.28                   | 2.42                    | 2.25          |
| Ratio of SL to HL                            | 3.16                    | 3.13                   | 2.99                   | 2.97                    | 3.02          |
| Ratio of ED to SL                            | 0.12                    | 0.11                   | 0.13                   | 0.13                    | 0.13          |
| Ratio of ED to HL                            | 0.37                    | 0.35                   | 0.40                   | 0.37                    | 0.38          |
| Ratio of ED to IOW                           | 0.98                    | 1.06                   | 1.11                   | 1.08                    | 1.13          |
| Ratio of ED to MRC                           | NA                      | 1.03                   | 1.11                   | 1.10                    | 1.09          |

**Supplementary Table S2.** Measurements on voucher specimens of *G. griseus*. NTUM National Taiwan University Museums, Taipei; *AF* anal fin; *BD* largest body depth; *CF* caudal fin; *DF* dorsal fin; *SL* standard length; *AF* anal fin; *DF* dorsal fin

| Measurement                                | Voucher no. |           |           |           |           |           |            |            |
|--------------------------------------------|-------------|-----------|-----------|-----------|-----------|-----------|------------|------------|
|                                            | NTUM 10768  |           |           |           |           |           | NTUM 10722 | NTUM 10808 |
|                                            | (Let1000)   | (Let1001) | (Let1007) | (Let1008) | (Let1009) | (Let1010) | (Let734)   | (Let1168)  |
| SL (mm)                                    | 208         | 197       | 245       | 260       | 290       | 325       | 298        | 325        |
| Body depth (BD) (mm)                       | 96          | 95        | 111       | 115       | 126       | 143       | 126        | 138        |
| BD at origin of DF (BDd) (mm)              | 95          | 93        | 108       | 112       | 125       | 141       | 123        | 137        |
| BD at origin of AF (mm)                    | 85          | 85        | 102.2     | 104.3     | 123.6     | 132       | 121        | 128        |
| Head length (HL) (mm)                      | 65.5        | 60.0      | 74.5      | 80.0      | 86.7      | 95.0      | 87.3       | 94.0       |
| Snout length (mm)                          | 20.8        | 21.3      | 28.4      | 29.4      | 29.2      | 35.6      | 34.7       | 36.3       |
| Eye diameter (ED) (mm)                     | 23          | 22.5      | 27        | 27        | 27.5      | 28.2      | 28.2       | 30         |
| Inter-orbital width (IOW) (mm)             | 25          | 22.5      | 29.3      | 31.5      | 33        | 35.2      | 33         | 36         |
| Predorsal length (mm)                      | 70          | 70        | 86        | 86        | 100       | 113       | 101        | 108        |
| Prepelvic length (mm)                      | 67          | 67        | 77        | 85        | 94        | 103       | 95         | 105        |
| Preanal length (mm)                        | 131         | 124       | 150       | 160       | 180       | 200       | 175        | 195        |
| Median ray of caudal fin (MRC) length (mm) | na          | 24.8      | 28.0      | 29.7      | 33.0      | 36.3      | 33.3       | 26.2       |
| DF spines, rays                            | X, 10       | X, 10     | X, 10     | X, 10     | X, 10     | X, 10     | X, 11      | X, 10      |
| AF spines, rays                            | III, 10     | III, 10   | III, 10   | III, 10   | III, 10   | III, 10   | III, 11    | III, 10    |
| Pored scales on lateral line               | 47          | 47        | 47        | 48        | 47        | 46        | 48         | 48         |
| Ratio of SL to BD                          | 2.17        | 2.07      | 2.21      | 2.26      | 2.30      | 2.28      | 2.37       | 2.36       |
| Ratio of SL to BDd                         | 2.18        | 2.12      | 2.27      | 2.32      | 2.32      | 2.31      | 2.42       | 2.37       |
| Ratio of SL to HL                          | 3.18        | 3.28      | 3.29      | 3.25      | 3.34      | 3.42      | 3.41       | 3.46       |
| Ratio of ED to SL                          | 0.11        | 0.11      | 0.11      | 0.10      | 0.09      | 0.09      | 0.09       | 0.09       |
| Ratio of ED to HL                          | 0.35        | 0.38      | 0.36      | 0.34      | 0.32      | 0.30      | 0.32       | 0.32       |
| Ratio of ED to IOW                         | 0.92        | 1.00      | 0.92      | 0.86      | 0.83      | 0.80      | 0.85       | 0.83       |
| Ratio of ED to MRC                         | NA          | 0.91      | 0.96      | 0.91      | 0.83      | 0.78      | 0.85       | 1.15       |

**Supplementary Table S3.** Measurements on voucher specimens of *Gymnocranius* sp.D. NTUM National Taiwan University Museums, Taipei; *AF* anal fin; *BD* largest body depth; *CF* caudal fin; *DF* dorsal fin; *SL* standard length; *AF* anal fin; *DF* dorsal fin

| Measurement                                | Specimen no.            |                         |                         |                                   |         |
|--------------------------------------------|-------------------------|-------------------------|-------------------------|-----------------------------------|---------|
|                                            | NTUM 10818<br>(Let1211) | NTUM 10826<br>(Let1191) | NTUM 10831<br>(Let1341) | NTUM 10835<br>(Let1362) (Let1363) |         |
| SL (mm)                                    | 191                     | 176                     | 205                     | 224                               | 149     |
| Body depth (BD) (mm)                       | 87                      | 73                      | 81                      | 97                                | 65      |
| BD at origin of DF (BDd) (mm)              | 86                      | 71                      | 80                      | 95                                | 63      |
| BD at origin of AF (mm)                    | 80                      | 68                      | 73                      | 92                                | 60      |
| Head length (HL) (mm)                      | 57.8                    | 57.0                    | 67.0                    | 71.0                              | 47.8    |
| Snout length (mm)                          | 18                      | 16.6                    | 21.4                    | 23.6                              | 15.6    |
| Eye diameter (ED) (mm)                     | 21.5                    | 20.5                    | 27.0                    | 23.8                              | 17.4    |
| Inter-orbital width (IOW) (mm)             | 24.8                    | 20.3                    | 28                      | 28.5                              | 19.4    |
| Predorsal length (mm)                      | 67                      | 59                      | 80                      | 83                                | 53      |
| Prepelvic length (mm)                      | 63                      | 59                      | 74                      | 76                                | 50      |
| Preanal length (mm)                        | 118                     | 118                     | 126                     | 135                               | 86      |
| Median ray of caudal fin (MRC) length (mm) | 23.0                    | 18.3                    | 26.0                    | 24.5                              | 18.0    |
| DF spines, rays                            | X, 10                   | X, 10                   | X, 10                   | X, 10                             | X, 10   |
| AF spines, rays                            | III, 10                 | III, 10                 | III, 10                 | III, 10                           | III, 10 |
| Pored scales on lateral line               | 49                      | 50                      | 49                      | 49                                | 48      |
| Ratio of SL to BD                          | 2.21                    | 2.42                    | 2.53                    | 2.31                              | 2.29    |
| Ratio of SL to BDd                         | 2.22                    | 2.49                    | 2.56                    | 2.36                              | 2.37    |
| Ratio of SL to HL                          | 3.30                    | 3.09                    | 3.06                    | 3.15                              | 3.12    |
| Ratio of ED to SL                          | 0.11                    | 0.12                    | 0.13                    | 0.11                              | 0.12    |
| Ratio of ED to HL                          | 0.37                    | 0.36                    | 0.40                    | 0.34                              | 0.36    |
| Ratio of ED to IOW                         | 0.87                    | 1.01                    | 0.96                    | 0.84                              | 0.90    |
| Ratio of ED to MRC                         | 0.93                    | 1.12                    | 1.04                    | 0.97                              | 0.97    |

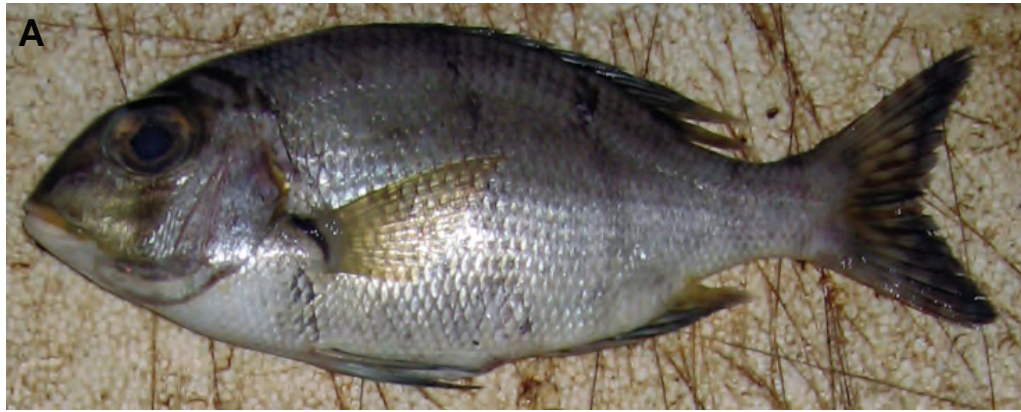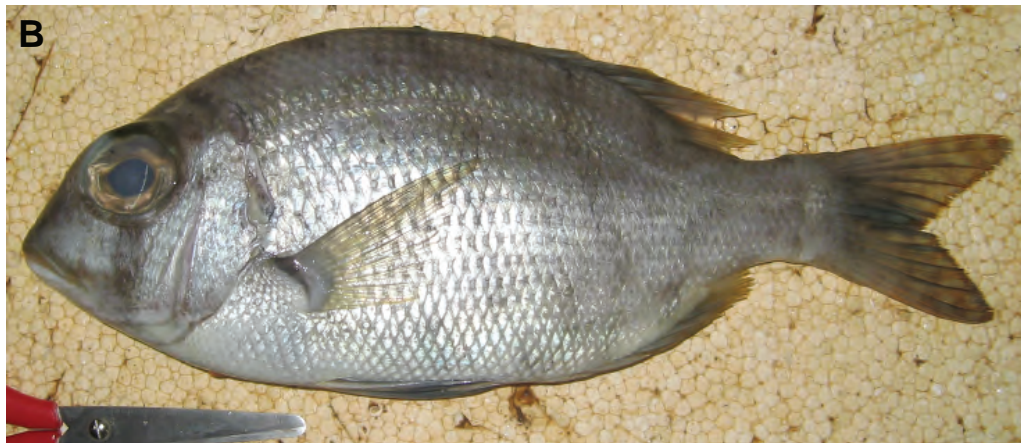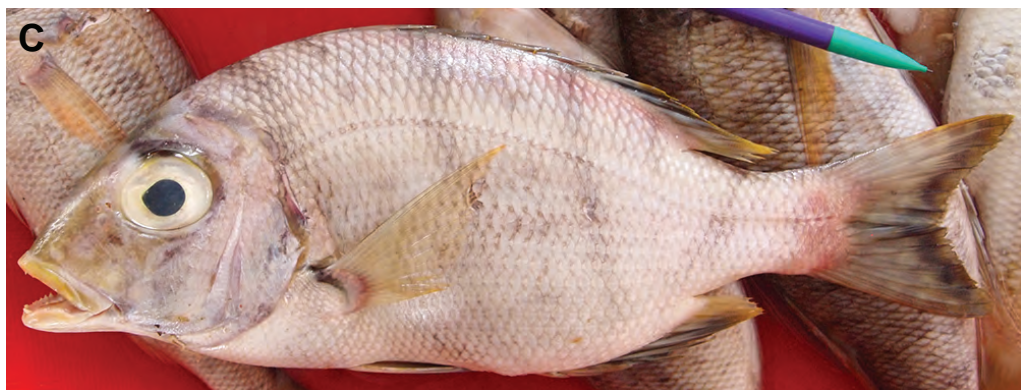

**Supplementary Fig. S1.** *Gymnocranius obesus* sp. nov. specimens from Indonesia. **A.** Specimen no. 20070222-G2, Kedonganan fish market, Bali, 22 Feb. 2007 (photographed by F. Giancarlo). **B.** Specimen no. 20070223-G5, Kedonganan fish market, Bali, 23 Feb. 2007 (photographed by F. Giancarlo). **C.** Specimen no. 20150503-5, Labuan Bajo fish market, Flores Sea, 03 May 2015 (photographed by S. Bari).

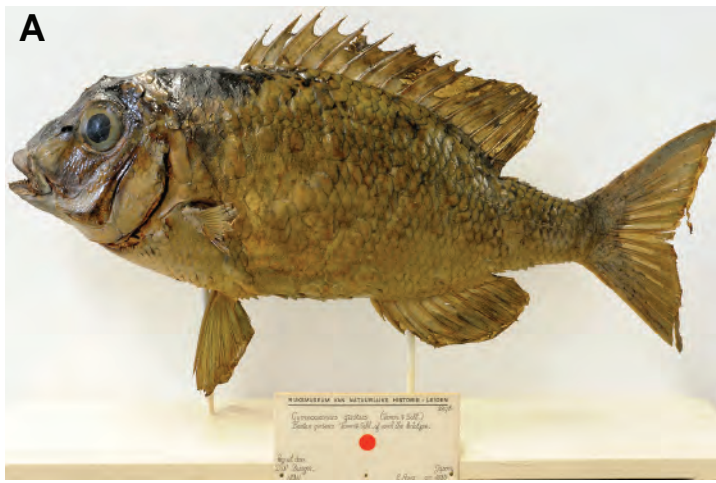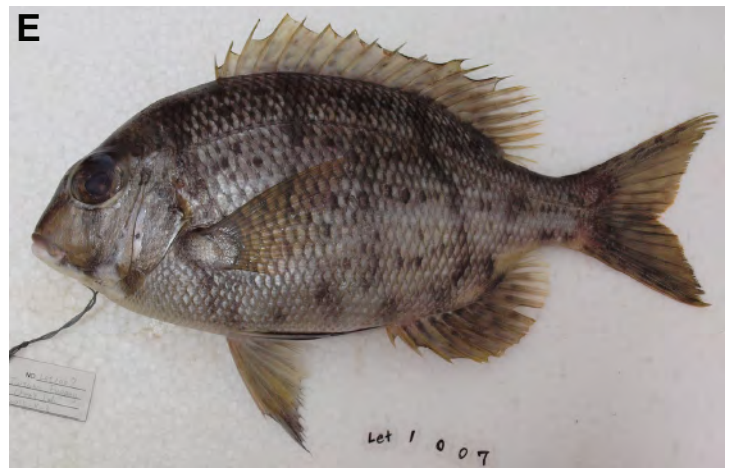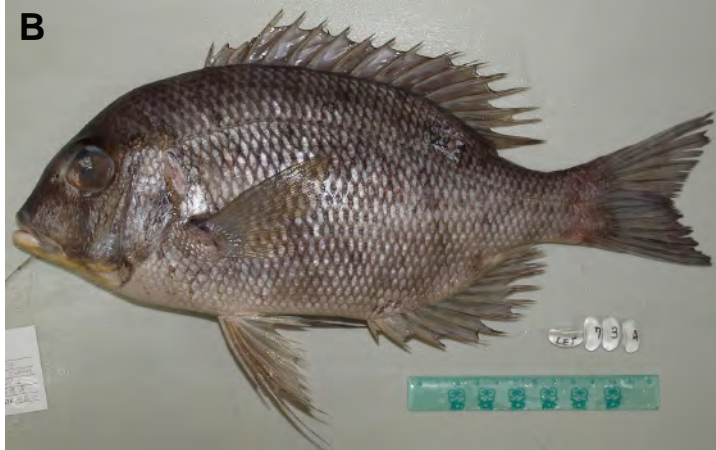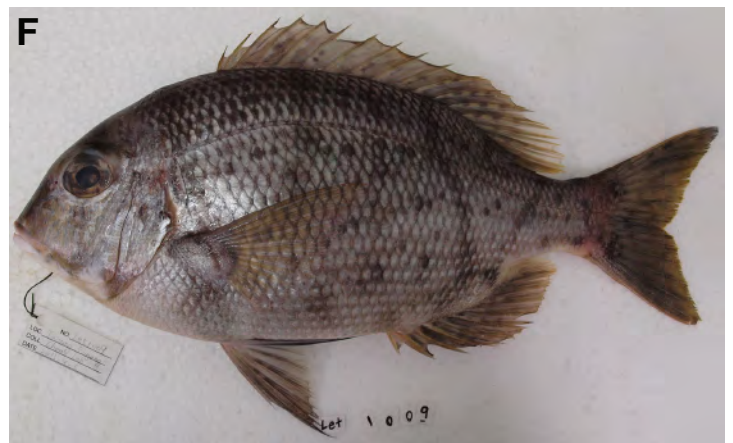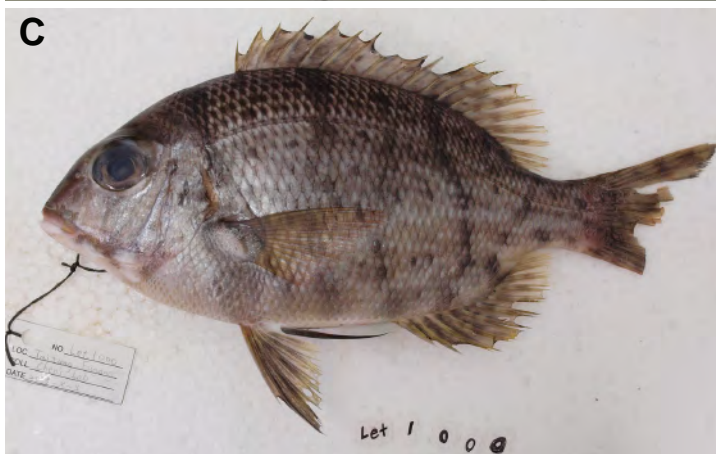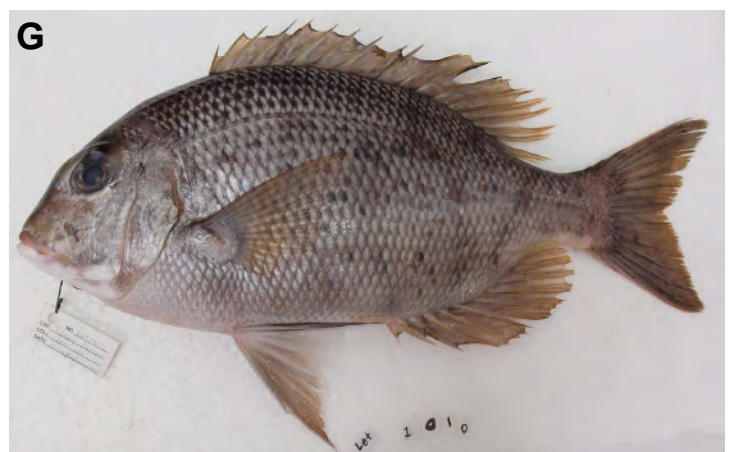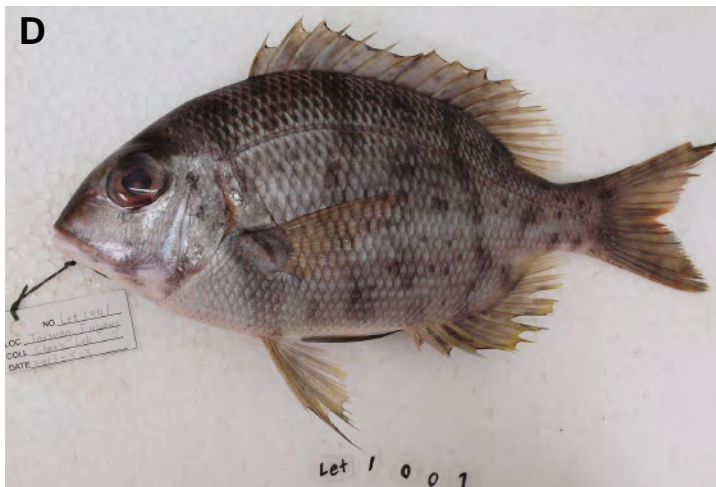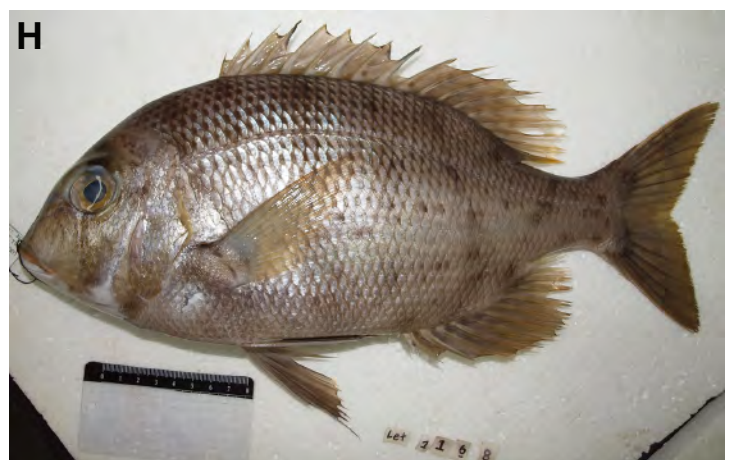

**Supplementary Fig. S2.** *Gymnocranius griseus* (Temminck and Schlegel 1843). **A.** Specimen no. RMNH.PISC.D.2248, lectotype of the species, SL 343 mm, collected by H. Burger in the Nagasaki region, Japan, ca. 1830 (photographed by Naturalis, Leiden). **B.** Specimen NTUM10722 (= Let734), SL 298 mm, from Chenggong fishing port, Taiwan, 10 September 2012 (photographed by WJC). **C-G.** Respectively, specimens NTUM10768-Let1000 (SL 208 mm), NTUM10768-Let1001 (SL 197 mm), NTUM 10768-Let1007 (SL 245 mm), NTUM 10768-Let1009 (SL 290 mm), and NTUM10768-Let1010 (SL 325 mm ) from Fugang fishing port, Taiwan, 03 October 2013 (photographed by WJC). **H.** Specimen NTUM10808 (= Let1168), SL 325 mm, from Fugang fishing port, Taiwan, 09 January 2015 (photographed by WJC).

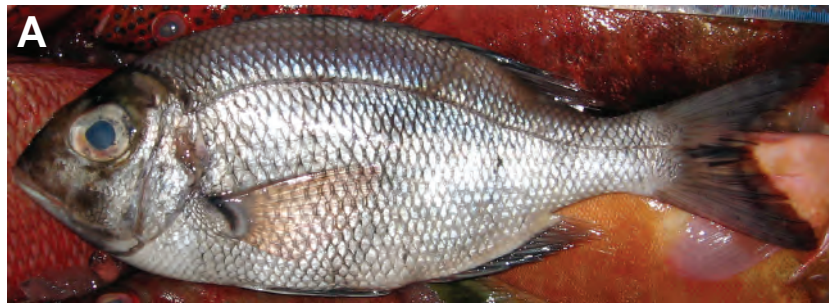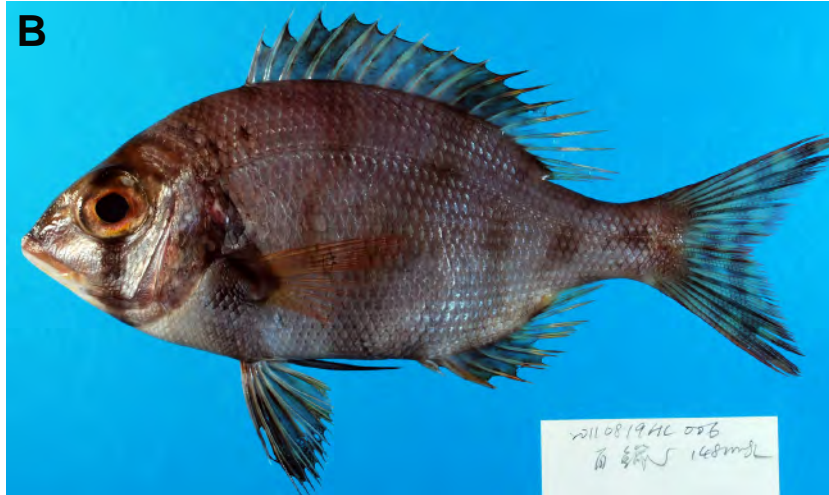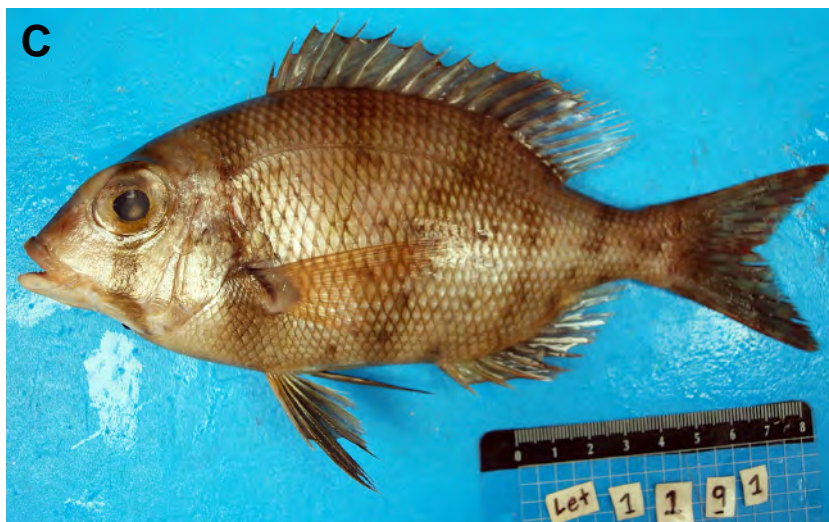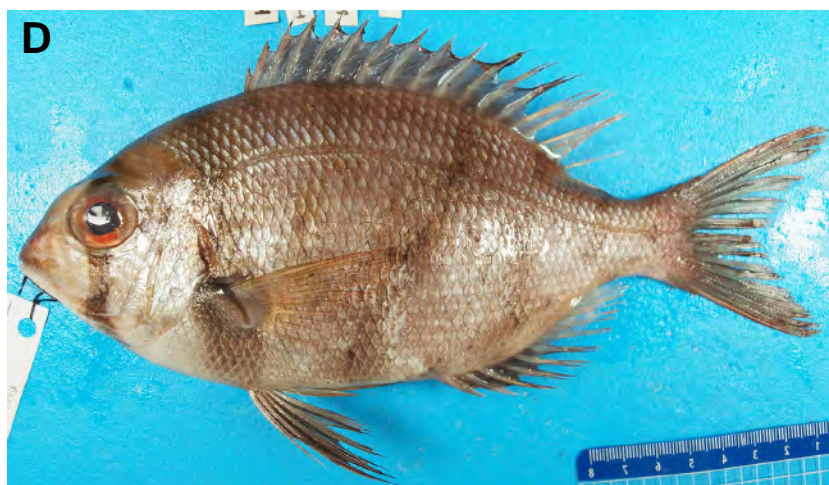

**Supplementary Fig. S3.** *Gymnocranius* sp. D. **A.** Specimen no. 20070222-G1, SL 248 mm, Kedonganan fish market, Bali, 22 Feb. 2007 (photographed by F. Giancarlo). **B.** Specimen no. Let427, SL 148 mm, from Hengchun, Taiwan, 19 August 2008 (photographed by H.-C. Ho). **C.** Specimen no. NTUM 10826 (= Let1191), SL 176 mm, from Hengchun, Taiwan, 10 March 2015 (photographed by WJC). **D.** Specimen no. NTUM 10818 (= Let1211), SL 191 mm, from Penghu, Taiwan, 04 May 2015 (photographed by WJC).

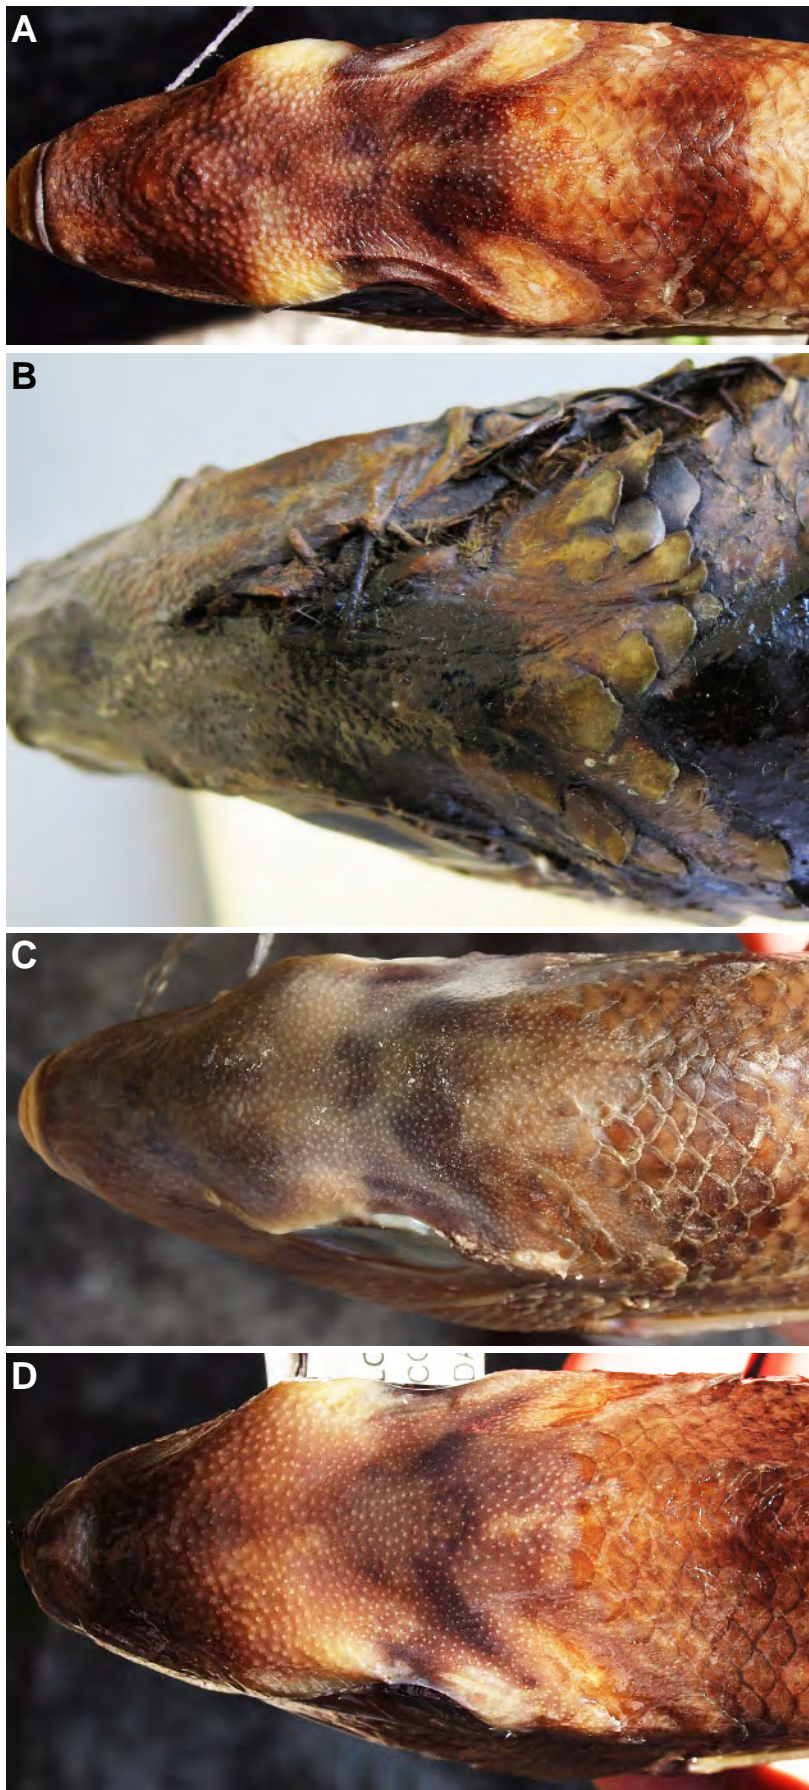

**Supplementary Fig. S4.** Zoom-in on the dorsal side of head, to enable the count of front scales. **A.** *Gymnocranius obesus* sp. nov., specimen no. NTUM 10741-Let892 from Hengchun Town, Taiwan, 10 March 2015 (photographed by WJC). **B.** *Gymnocranius griseus*, lectotype, no. RMNH.N.PISC.D.2248 (photographed by RM). **C.** *Gymnocranius griseus*, specimen no. NTUM 10768-Let1007 from Fugang fishing port, Taiwan, 03 October 2013 (photographed by WJC). **D.** *Gymnocranius* sp. D, specimen no. NTUM 10818 (Let1211) from Penghu, Taiwan, 04 May 2015 (photographed by WJC).



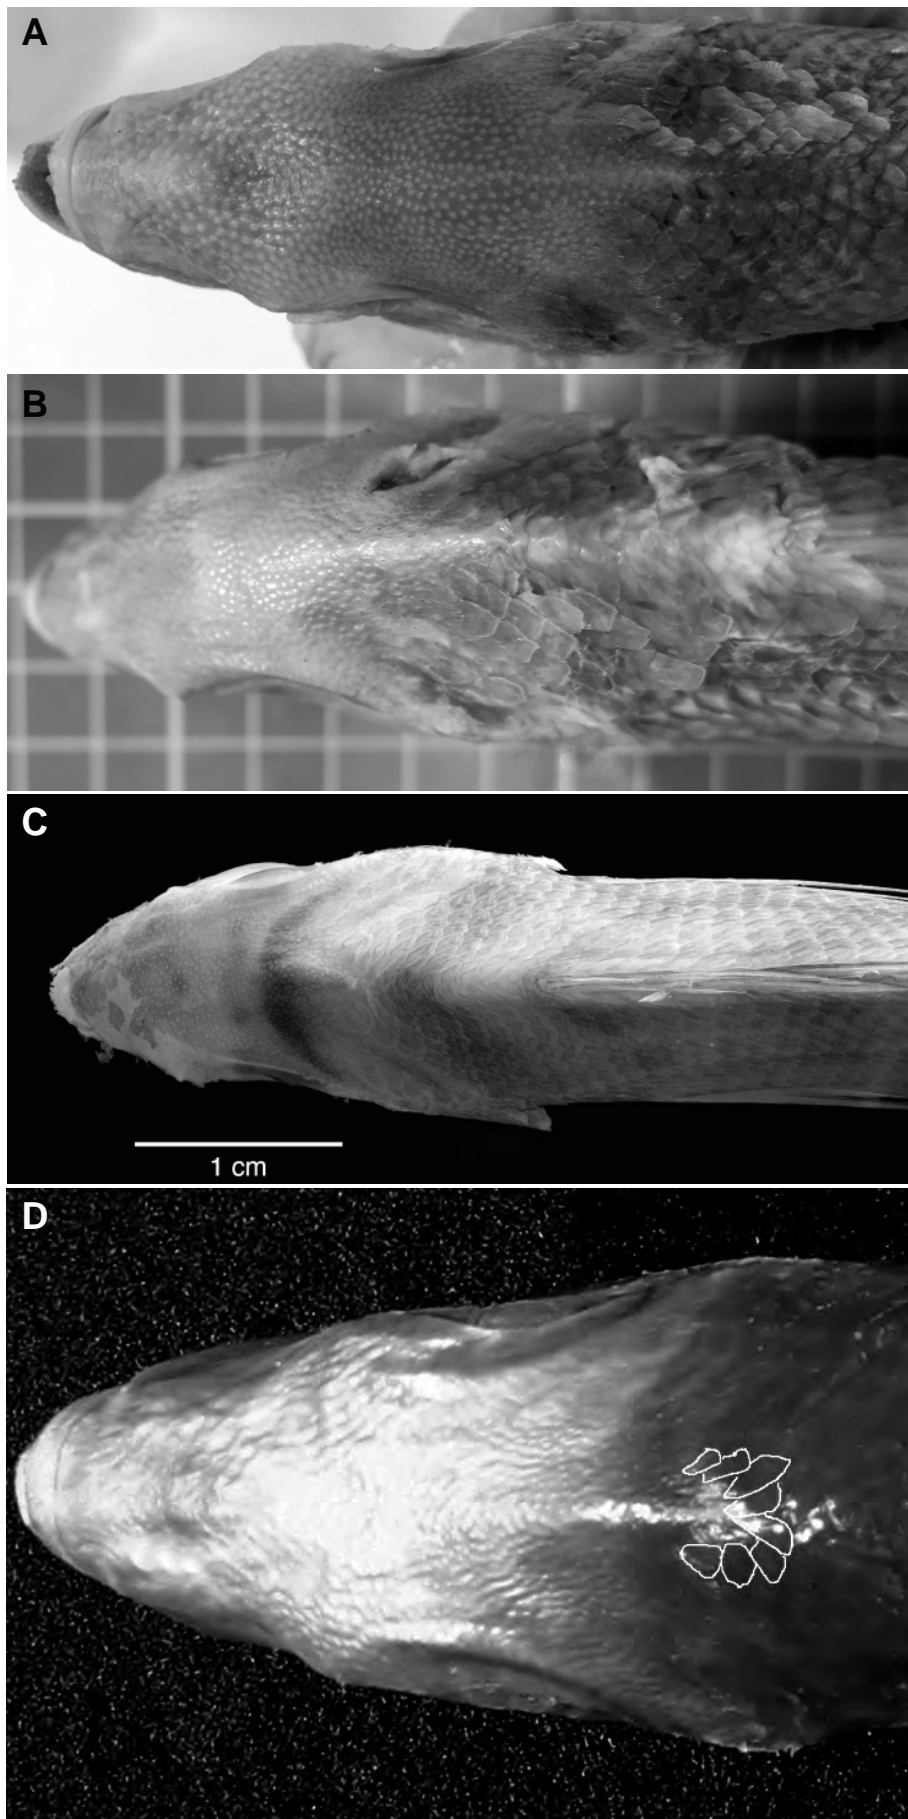

**Supplementary Fig. S5.** Dorsal side of head in type specimens of several species under *Gymnocranius*. **A.** *Pentapus curtus* Guichenot 1863, specimen no. MNHN 0000-1317 (holotype, photographed by RM). **B.** *Dentex lethrinoides* Bleeker 1850, specimen no. RMNH 5680 (holotype, photographed by RM). **C.** *Gymnocranius orbis* Fowler 1938, specimen no. ANSP 68291 (holotype, photographed by M.S. Perez). **D.** *Dentex robinsoni*, specimen no. SAM 10037 (holotype, photograph provided by M. Bougaardt and A. Bosman).
